# Supplementary material for: Participatory Action Research Applied to an Ear, Nose, and Throat Specialty Service Redesign in Remote Australia: A Mixed-Methods Study of Key Stakeholder Perspectives
Source: MDPI journal article supplement (doi:10.3390/ijerph18010167), 2020-12-29
Supplement: s1 [file s1]

## 1. What best describes your working role in Cape York Primary Health Centres?

- ☐ Indigenous Health Worker
- ☐ Clinical Nurse
- ☐ Nursing Manager
- ☐ Audiologist
- ☐ Medical Officer
- ☐ Visiting Specialist
- ☐ Other (please specify)

## 2. How long have you worked in this role (or similar role at another location)?

- ☐ < 3months
- ☐ 3-6 months
- ☐ 6-12 months
- ☐ > 12 months
- ☐ Other (please specify)

### 3. Do you work for any of the following Primary Health Care providers?

- ☐ Apunipima Cape York Health Council
- ☐ Royal Flying Doctor Service (RFDS)
- ☐ Torres and Cape Hospital Health Service (TCHHS)
- ☐ Deadly Ears Program - Queensland Health
- ☐ Other (please specify)

### 4. When you assess ears or hearing health, what equipment do you use?

- ☐ Otoscope
- ☐ Video otoscope
- ☐ Flexicam Otoscope
- ☐ Tympanometer
- ☐ Audiometer
- ☐ Australian Hearing App- Hearing scouts
- ☐ Other (please specify)

### 5. Which of these pieces of equipment, if any, you do not feel confident using?

- ☐ Otoscope
- ☐ Video otoscope
- ☐ Flexicam Otoscope
- ☐ Tympanometer
- ☐ Audiometer
- ☐ Australian Hearing App- Hearing scouts
- ☐ All of the above
- ☐ None- I am confident using all equipment
- ☐ Other (please specify)

## 6. Which clinical care guidelines do you mostly use when reviewing Ear/ hearing presentations?

- ☐ Primary Clinical Care Manual (PCCM-QH)
- ☐ Clinical Care guidelines for treatment of Otitis Media in Aboriginal & Torres Strait Islander populations (NHMRC)
- ☐ Therapeutic Guidelines
- ☐ Clinical Prioritisation Criteria (QHEPS-QH)
- ☐ Deadly Ears Guidelines and Protocols- QH
- ☐ Clinical judgement
- ☐ CARPA
- ☐ Other (please specify)

## 7. How confident do you feel about making Ear/hearing assessments?

Not confident

Confident

☐

## 8. Which of the following conditions, if any, are you unsure of in your ear assessments?

- ☐ Acute Otitis Media (AOM)
- ☐ Acute Otitis Media without Perf (AOMwoP)
- ☐ Acute Otitis Media with Perf (AOMwiP)
- ☐ Chronic suppurative Otitis Media (CSOM)
- ☐ Dry Perforation
- ☐ Otitis Media Effusion (OME)
- ☐ none - I am confident in all of them
- ☐ Other (please specify)

## 9. How confident do you feel about long-term Ear condition management?

not very confident

confident

☐

## 10. Which conditions, if any, do you not feel confident managing?

- ☐ Acute Otitis Media (AOM)
- ☐ Acute Otitis Media without Perf (AOMwoP)
- ☐ Acute Otitis Media with Perf (AOMwiP)
- ☐ Chronic suppurative Otitis Media (CSOM)
- ☐ Dry Perforation
- ☐ Otitis Media Effusion (OME)
- ☐ None- I'm confident in all of them
- ☐ Other (please specify)

## 11. Which of these reasons would you refer for medical advice or ENT specialist advice?

- ☐ For a second opinion on a clinical decision
- ☐ To take over patient Ear condition management
- ☐ For Ear condition management advice
- ☐ To refer for surgery
- ☐ Other (please specify)

## 12. How do you think using TeleHealth for ENT consults would be received in your community?

- ☐ I consider they would be well received
- ☐ No- I don't think they would be well received

Reason for this response

## 13. Would community members (patient carers) welcome Ear Health information to take home?

- ☐ I consider this would be well received
- ☐ No- I don't consider they would be well received

Reason for your response

#### 14. Would you be happy to attend face-to-face Ear and hearing training?

- ☐ Yes
- ☐ No, thanks
- ☐ Other (please specify)

#### 15. Which of the following, if any, would you be happy to attend?

- ☐ Identification of different Otitis Media conditions
- ☐ Use of current guidelines for treatment and management of ear disease
- ☐ Ear suctioning and tympanometry
- ☐ Long-term community management of Otitis Media conditions
- ☐ How and when to seek specialist ENT input (referral)

Other (please specify)

#### 16. Please let us know of other ENT issues you are concerned about

#### 17. If you would like further information on training or to be involved in discussions on ENT model of care development, please provide your contact details below:

Name

Email Address

Phone Number
